# Supplementary material
Source: Royal Society of Chemistry journal article supplement (doi:10.1039/d6fo00445h)
Supplement: d6fo00445h1.pdf [file d6fo00445h1.pdf]

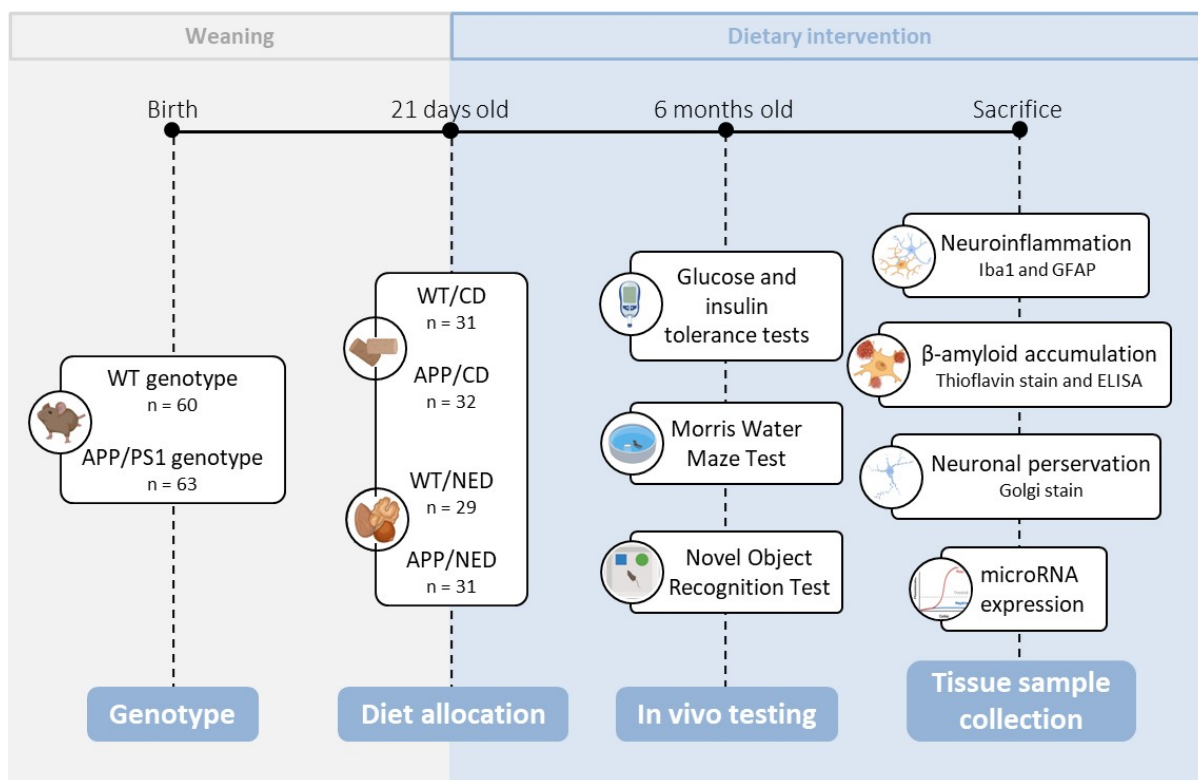

**Figure S1.** Graphical representation of experimental design. APP/PS1 (APP) and wild-type (WT) littermates were randomly assigned to either a conventional chow diet (CD) or a nut-enriched diet (NED) providing 10% of the energy from nuts at 21 days old. At 6 months, animals underwent glucose and insulin tolerance tests and followed by behavioural assessments (Morris Water Maze test and Novel Object Recognition Test). Animals were then sacrificed, and blood and brain samples were collected to evaluate neuroinflammation,  $\beta$ -amyloid accumulation, neuronal preservation and microRNA expression. Abbreviations: WT, wild-type; APP, APP/PS1 transgenic mice mutation; CD, control diet; NED, nuts-enriched diet; Iba1, ionized calcium binding adaptor molecule 1; GFAP, glial fibrillary acidic protein; ELISA, enzyme-linked immunosorbent assay.

**Table S1.** Nutritional composition of experimental diets.

| Component               | Nut-Enriched Diet | Control Diet     |
|-------------------------|-------------------|------------------|
| Energy Density (kcal/g) | 3.1 (13.0 MJ/kg)  | 3.1 (13.0 MJ/kg) |
| Carbohydrates (%E)      | 45                | 58               |

| <b>Component</b>       | <b>Nut-Enriched Diet</b> | <b>Control Diet</b> |
|------------------------|--------------------------|---------------------|
| <b>Fat (%E)</b>        | 33                       | 18                  |
| <b>Protein (%E)</b>    | 22                       | 24                  |
| <b>Crude Fiber (%)</b> | 4.5                      | 3.5                 |

The table compares energy density (kcal/g), the relative contribution of carbohydrates, fat, and protein to total energy intake (%E), and crude fiber content as a percentage of total composition (%).

**Table S2.** Neuroinflammation immunofluorescence primary and secondary antibodies.

| <b>Protein</b>                               | <b>Antibody</b>            |
|----------------------------------------------|----------------------------|
| GFAP                                         | Z0334 (Dako)               |
| IBA1                                         | O19-19741 (Wako)           |
| Secondary Alexa Fluor 488 (Goat-Anti Mouse)  | A11001 (Life Technologies) |
| Secondary Alexa Fluor 594 (Goat-Anti Rabbit) | A11080 (Life Technologies) |

Primary and secondary to evaluate microglia and astrocyte activation in the brain. Glial fibrillary acidic protein (GFAP) was used to assess astrocyte reactivity, while ionized calcium binding adaptor molecule 1 (IBA1) was used for microglia assessment. Abbreviations: GFAP, glial fibrillary acidic protein; IBA1, ionized calcium binding adaptor molecule 1.

**Table S3.** Differences in the expression of miRNAs in serum, cortex and hippocampus.

|                     | <b>Comparison</b> |                  |                    |                    |
|---------------------|-------------------|------------------|--------------------|--------------------|
|                     | APP/CD and WT/CD  | WT/CD and WT/NED | APP/CD and APP/NED | WT/NED and APP/NED |
| <b>Serum</b>        |                   |                  |                    |                    |
| <b>let-7b-3p</b>    | 0,194             | 0,483            | 0,916              | 0,593              |
| <b>miR-122-5p</b>   | 0,036             | 0,740            | 0,287              | 0,006              |
| <b>miR-187-3p</b>   | 0,684             | 0,946            | 0,009              | 0,024              |
| <b>miR-214-3p</b>   | 0,105             | 0,316            | 0,357              | 0,063              |
| <b>miR-338-5p</b>   | 0,242             | 0,950            | 0,685              | 0,901              |
| <b>miR-429-3p</b>   | 0,782             | 0,987            | 0,030              | 0,177              |
| <b>miR-451a</b>     | 0,484             | 0,223            | 0,000              | 0,026              |
| <b>miR-6240</b>     | 0,024             | 0,734            | 0,487              | 0,286              |
| <b>miR-669a-5p</b>  | 0,029             | 0,275            | 0,033              | 0,165              |
| <b>miR-669o-5p</b>  | 0,402             | 0,987            | 0,504              | 0,330              |
| <b>miR-702-3p</b>   | 0,155             | 0,616            | 0,694              | 0,901              |
| <b>miR-19a-3p</b>   | 0,433             | 0,278            | 0,091              | 0,175              |
| <b>miR-98-5p</b>    | 0,011             | 0,022            | 0,038              | 0,038              |
| <b>miR-29c-3p</b>   | 0,114             | 0,011            | 0,821              | 0,262              |
| <b>miR-338-3p</b>   | <0,001            | 0,399            | 0,052              | 0,420              |
| <b>miR-34a-5p</b>   | 0,979             | 0,715            | 0,119              | 0,365              |
| <b>Cortex</b>       |                   |                  |                    |                    |
| <b>let-7b-3p</b>    | 0,012             | 0,078            | 0,101              | 0,533              |
| <b>miR-122-5p</b>   | 0,038             | 0,073            | 0,033              | 0,063              |
| <b>miR-153-3p</b>   | 0,041             | 0,727            | 0,179              | 0,728              |
| <b>miR-187-3p</b>   | 0,219             | 0,663            | 0,421              | 0,321              |
| <b>miR-214-3p</b>   | 0,120             | 0,017            | 0,135              | 0,042              |
| <b>miR-218-2-3p</b> | 0,131             | 0,053            | 0,006              | 0,006              |
| <b>miR-338-5p</b>   | 0,018             | 0,270            | 0,493              | 0,553              |
| <b>miR-3547-3p</b>  | 0,045             | 0,988            | 0,850              | 0,098              |
| <b>miR-451a</b>     | 0,035             | 0,029            | 0,019              | 0,026              |
| <b>miR-6240</b>     | 0,010             | 0,399            | 0,907              | 0,051              |
| <b>miR-669o-5p</b>  | 0,102             | 0,491            | 0,186              | 0,632              |
| <b>miR-702-3p</b>   | 0,013             | 0,169            | 0,170              | 0,930              |
| <b>miR-19a-3p</b>   | 0,184             | <0,001           | 0,118              | 0,001              |
| <b>miR-98-5p</b>    | 0,494             | 0,271            | 0,053              | 0,070              |
| <b>miR-29c-3p</b>   | 0,031             | 0,032            | 0,258              | 0,358              |
| <b>miR-338-3p</b>   | 0,079             | 0,850            | 0,595              | 0,175              |
| <b>Hippocampus</b>  |                   |                  |                    |                    |

|                     |       |       |       |       |
|---------------------|-------|-------|-------|-------|
| <b>let-7b-3p</b>    | 0,813 | 0,715 | 0,042 | 0,159 |
| <b>miR-122-5p</b>   | 0,333 | 0,257 | 0,406 | 0,286 |
| <b>miR-153-3p</b>   | 0,163 | 0,017 | 0,774 | 0,338 |
| <b>miR-187-3p</b>   | 0,576 | 0,302 | 0,683 | 0,317 |
| <b>miR-214-3p</b>   | 0,778 | 0,385 | 0,461 | 0,313 |
| <b>miR-218-2-3p</b> | 0,086 | 0,209 | 0,314 | 0,702 |
| <b>miR-338-5p</b>   | 0,050 | 0,319 | 0,099 | 0,037 |
| <b>miR-3547-3p</b>  | 0,855 | 0,683 | 0,721 | 0,989 |
| <b>miR-451a</b>     | 0,017 | 0,012 | 0,049 | 0,040 |
| <b>miR-6240</b>     | 0,577 | 0,334 | 0,038 | 0,003 |
| <b>miR-6690-5p</b>  | 0,842 | 0,650 | 0,799 | 0,443 |
| <b>miR-702-3p</b>   | 0,466 | 0,638 | 0,005 | 0,002 |
| <b>miR-19a-3p</b>   | 0,035 | 0,088 | 0,034 | 0,199 |
| <b>miR-98-5p</b>    | 0,960 | 0,781 | 0,893 | 0,707 |
| <b>miR-29c-3p</b>   | 0,813 | 0,357 | 0,667 | 0,318 |
| <b>miR-338-3p</b>   | 0,355 | 0,020 | 0,860 | 0,101 |
| <b>miR-34a-5p</b>   | 0,465 | 0,033 | 0,224 | 0,003 |

Differences between experimental groups were assessed by Student's T test or Mann-Whitney test according to normality. Statistical significance was set at p-value <0.05. Abbreviations: WT, wild-type; APP, APP/PS1; CD, control diet; NED, nuts-enriched diet.

**Table S4.** KEGG pathway and GO functional enrichment analysis.

| Gene Set                       | Description                                                          | Size | Expect | Ratio  | P Value     | FDR         |
|--------------------------------|----------------------------------------------------------------------|------|--------|--------|-------------|-------------|
| <b>KEGG Pathways</b>           |                                                                      |      |        |        |             |             |
| mmu04930                       | Type II diabetes mellitus                                            | 48   | 9.8743 | 2.0255 | 7.07E-04    | 0.010731    |
| mmu04929                       | GnRH secretion                                                       | 63   | 12.96  | 1.929  | 3.94E-04    | 0.0090867   |
| mmu04213                       | Longevity regulating pathway                                         | 61   | 12.549 | 1.9126 | 0.00059355  | 0.010357    |
| mmu04068                       | FoxO signaling pathway                                               | 131  | 26.949 | 1.8925 | 9.72E-07    | 1.81E-04    |
| mmu04720                       | Long-term potentiation                                               | 67   | 13.783 | 1.8864 | 4.59E-04    | 9.43E-03    |
| mmu04350                       | TGF-beta signaling pathway                                           | 110  | 22.629 | 1.8561 | 0.000015183 | 0.0007941   |
| mmu04721                       | Synaptic vesicle cycle                                               | 77   | 15.84  | 1.7677 | 0.00095652  | 0.011781    |
| mmu04971                       | Gastric acid secretion                                               | 75   | 15.429 | 1.75   | 0.0013919   | 0.014038    |
| mmu04360                       | Axon guidance                                                        | 181  | 37.234 | 1.7457 | 1.04E-06    | 0.000181    |
| mmu03083                       | Polycomb repressive complex                                          | 84   | 17.28  | 1.7361 | 0.00090136  | 0.011781    |
| mmu04140                       | Autophagy                                                            | 166  | 34.149 | 1.7277 | 4.72E-06    | 0.00041179  |
| mmu04910                       | Insulin signaling pathway                                            | 139  | 28.594 | 1.7136 | 0.000037752 | 0.0016469   |
| mmu04150                       | mTOR signaling pathway                                               | 157  | 32.297 | 1.7029 | 0.000015927 | 0.0007941   |
| mmu04912                       | GnRH signaling pathway                                               | 90   | 18.514 | 1.6744 | 0.0014782   | 0.01433     |
| mmu04015                       | Rap1 signaling pathway                                               | 214  | 44.023 | 1.6582 | 2.1495E-06  | 0.00025006  |
| mmu05206                       | MicroRNAs in cancer                                                  | 162  | 33.326 | 1.6504 | 0.000043787 | 0.001698    |
| mmu04725                       | Cholinergic synapse                                                  | 112  | 23.04  | 1.6493 | 0.00064158  | 0.010662    |
| mmu04722                       | Neurotrophin signaling pathway                                       | 121  | 24.892 | 1.6471 | 0.00041253  | 0.0090867   |
| mmu04152                       | AMPK signaling pathway                                               | 127  | 26.126 | 1.6459 | 0.00030751  | 0.0089434   |
| mmu05414                       | Dilated cardiomyopathy                                               | 101  | 20.777 | 1.6364 | 0.0014078   | 0.014038    |
| <b>GO Biological processes</b> |                                                                      |      |        |        |             |             |
| GO:0016482                     | cytosolic transport                                                  | 122  | 27.229 | 1.9097 | 4.09E-07    | 0.00004967  |
| GO:0098876                     | vesicle-mediated transport to the plasma membrane                    | 148  | 33.032 | 1.7862 | 1.0816E-06  | 0.00009194  |
| GO:0099072                     | regulation of postsynaptic membrane neurotransmitter receptor levels | 129  | 28.791 | 1.7714 | 7.4799E-06  | 0.00027768  |
| GO:1902414                     | protein localization to cell junction                                | 127  | 28.345 | 1.7287 | 0.000024168 | 0.00064197  |
| GO:0016358                     | dendrite development                                                 | 299  | 66.733 | 1.7233 | 1.46E-10    | 1.24E-07    |
| GO:0002065                     | columnar/cuboidal epithelial cell differentiation                    | 133  | 29.684 | 1.7181 | 0.000020283 | 0.00055614  |
| GO:0050803                     | regulation of synapse structure or activity                          | 303  | 67.626 | 1.671  | 1.77E-09    | 7.50E-07    |
| GO:0016331                     | morphogenesis of embryonic epithelium                                | 177  | 39.504 | 1.6707 | 0.000004084 | 0.00020372  |
| GO:0035148                     | tube formation                                                       | 172  | 38.388 | 1.6672 | 6.1547E-06  | 0.00026157  |
| GO:0099173                     | postsynapse organization                                             | 252  | 56.243 | 1.6357 | 1.77E-07    | 0.000030044 |
| GO:0030534                     | adult behavior                                                       | 176  | 39.281 | 1.6038 | 0.000029558 | 0.00076136  |
| GO:0097485                     | neuron projection guidance                                           | 234  | 52.226 | 1.5892 | 2.66E-06    | 0.00018821  |
| GO:0031503                     | protein-containing complex localization                              | 233  | 52.003 | 1.5768 | 4.3141E-06  | 0.00020372  |
| GO:0048167                     | regulation of synaptic plasticity                                    | 240  | 53.565 | 1.5682 | 4.2439E-06  | 0.00020372  |
| GO:0006813                     | potassium ion transport                                              | 227  | 50.664 | 1.5593 | 0.000010266 | 0.00033562  |
| GO:0070085                     | glycosylation                                                        | 232  | 51.78  | 1.545  | 0.000013303 | 0.00038993  |
| GO:0060485                     | mesenchyme development                                               | 302  | 67.403 | 1.543  | 7.77E-07    | 0.000073379 |
| GO:0048638                     | regulation of developmental                                          | 372  | 83.026 | 1.5417 | 4.51E-08    | 9.5813E-06  |

|            |                                                             |     |        |        |             |            |
|------------|-------------------------------------------------------------|-----|--------|--------|-------------|------------|
| GO:1905475 | growth<br>regulation of protein localization<br>to membrane | 208 | 46.423 | 1.5294 | 0.000057517 | 0.0012222  |
| GO:0099003 | vesicle-mediated transport in<br>synapse                    | 258 | 57.583 | 1.5282 | 8.2437E-06  | 0.00029196 |

#### GO molecular functions

|            |                                                 |     |        |        |             |            |
|------------|-------------------------------------------------|-----|--------|--------|-------------|------------|
| GO:0098918 | structural constituent of synapse               | 38  | 8.3603 | 2.3922 | 0.00003437  | 0.001644   |
| GO:0106222 | lncRNA binding                                  | 21  | 4.6202 | 2.3809 | 0.0021977   | 0.045052   |
| GO:0046332 | SMAD binding                                    | 79  | 17.381 | 1.9562 | 0.000022577 | 0.0012959  |
| GO:0003727 | single-stranded RNA binding                     | 94  | 20.681 | 1.7891 | 1.03E-04    | 3.70E-03   |
| GO:0030165 | PDZ domain binding                              | 111 | 24.421 | 1.597  | 1.02E-03    | 2.43E-02   |
| GO:0019902 | phosphatase binding                             | 222 | 48.842 | 1.5151 | 5.89E-05    | 0.0024164  |
| GO:0106310 | protein serine kinase activity                  | 341 | 75.023 | 1.4929 | 1.91E-06    | 2.74E-04   |
| GO:0060589 | nucleoside-triphosphatase<br>regulator activity | 419 | 92.184 | 1.4428 | 1.74E-06    | 2.74E-04   |
| GO:0005516 | calmodulin binding                              | 183 | 40.262 | 1.4406 | 1.43E-03    | 0.031504   |
| GO:0046873 | metal ion transmembrane<br>transporter activity | 416 | 91.524 | 1.4313 | 3.30E-06    | 3.15E-04   |
| GO:0004674 | protein serine/threonine kinase<br>activity     | 411 | 90.424 | 1.4045 | 1.30E-05    | 0.00093364 |
| GO:0003729 | mRNA binding                                    | 313 | 68.863 | 1.365  | 4.96E-04    | 1.42E-02   |
| GO:0001217 | DNA-binding transcription<br>repressor activity | 334 | 73.483 | 1.3609 | 3.76E-04    | 0.012003   |
| GO:0051020 | GTPase binding                                  | 311 | 68.423 | 1.3592 | 6.19E-04    | 0.016151   |

#### GO Cellular component

|            |                                                                   |     |        |        |             |             |
|------------|-------------------------------------------------------------------|-----|--------|--------|-------------|-------------|
| GO:0060077 | inhibitory synapse                                                | 26  | 5.9303 | 2.3608 | 0.00056701  | 0.0080254   |
| GO:0060076 | excitatory synapse                                                | 93  | 21.212 | 1.98   | 0.000001448 | 0.000053285 |
| GO:0031201 | SNARE complex                                                     | 44  | 10.036 | 1.8932 | 0.0020987   | 0.020613    |
| GO:0098982 | GABA-ergic synapse                                                | 122 | 27.827 | 1.7968 | 5.0279E-06  | 0.00015075  |
| GO:0044309 | neuron spine                                                      | 232 | 52.916 | 1.7575 | 1.95E-09    | 8.98E-08    |
| GO:0043198 | dendritic shaft                                                   | 70  | 15.966 | 1.6911 | 0.0021285   | 0.020613    |
| GO:0098685 | Schaffer collateral - CA1 synapse                                 | 135 | 30.792 | 1.6563 | 0.000057376 | 0.001173    |
| GO:0098984 | neuron to neuron synapse                                          | 440 | 100.36 | 1.6341 | 1.79E-12    | 3.30E-10    |
| GO:0099572 | postsynaptic specialization                                       | 431 | 98.306 | 1.5564 | 6.79E-10    | 4.17E-08    |
| GO:0097060 | synaptic membrane                                                 | 494 | 112.68 | 1.5531 | 4.54E-11    | 4.18E-09    |
| GO:0044306 | neuron projection terminus                                        | 210 | 47.898 | 1.5241 | 0.000046218 | 0.001063    |
| GO:0048786 | presynaptic active zone                                           | 117 | 26.686 | 1.4614 | 0.0057784   | 0.04849     |
| GO:0035770 | ribonucleoprotein granule                                         | 262 | 59.759 | 1.4224 | 0.0001868   | 0.0030793   |
| GO:0031252 | cell leading edge                                                 | 455 | 103.78 | 1.3876 | 5.7349E-06  | 0.00015075  |
| GO:0150034 | distal axon                                                       | 388 | 88.498 | 1.3673 | 0.000066154 | 0.0012172   |
| GO:0061695 | transferase complex, transferring<br>phosphorus-containing groups | 278 | 63.408 | 1.3563 | 0.00095069  | 0.012495    |
| GO:0030139 | endocytic vesicle                                                 | 229 | 52.232 | 1.321  | 0.0057977   | 0.04849     |
| GO:0010008 | endosome membrane                                                 | 470 | 107.2  | 1.306  | 0.00020082  | 0.0030793   |
| GO:0043235 | receptor complex                                                  | 383 | 87.358 | 1.2935 | 0.0011714   | 0.01437     |
| GO:0045178 | basal part of cell                                                | 338 | 77.094 | 1.2842 | 0.0029334   | 0.026987    |
